# Supplementary material for: Immunity-and-matrix-regulatory cells derived from human embryonic stem cells safely and effectively treat mouse lung injury and fibrosis
Source: PubMed Central journal article supplement (PMC7296193; doi:10.1038/s41422-020-0354-1), 2020-06-16
Supplement: 41422_2020_354_MOESM1_ESM.pdf [file 41422_2020_354_MOESM1_ESM.pdf]

Figure S1

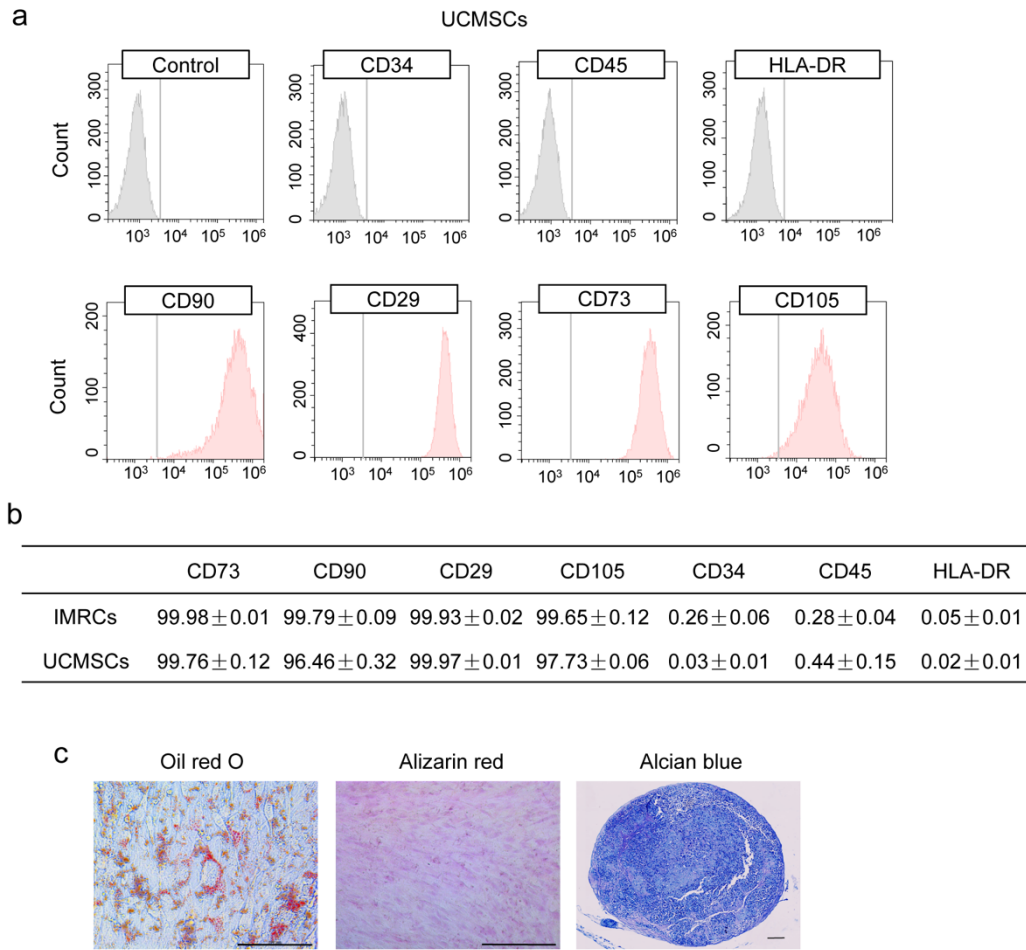

**Fig. S1 Derivation of Immunity- and Matrix-Regulatory Cells (IMRCs) from human embryonic stem cells (hESCs).**

**a** UCMSCs' expression of MSC-specific surface markers was determined by flow cytometry. Isotype control antibodies were used as controls for gating. The UCMSCs are CD34<sup>-</sup>/CD45<sup>-</sup>/HLA-DR<sup>-</sup>/CD90<sup>+</sup>/CD29<sup>+</sup>/CD73<sup>+</sup>/CD105<sup>+</sup> cells. **b** Quantification of flow cytometry for IMRCs and UCMSCs. **c** Representative staining of IMRCs after they were induced to undergo adipogenic differentiation (Oil Red O), osteogenic differentiation (Alizarin Red), and chondrogenic differentiation (Alcian Blue). Scale bars, 100  $\mu$ m.
