# Supplementary material for: Immunity-and-matrix-regulatory cells derived from human embryonic stem cells safely and effectively treat mouse lung injury and fibrosis
Source: PubMed Central journal article supplement (PMC7296193; doi:10.1038/s41422-020-0354-1), 2020-06-16
Supplement: 41422_2020_354_MOESM2_ESM.pdf [file 41422_2020_354_MOESM2_ESM.pdf]

Figure S2

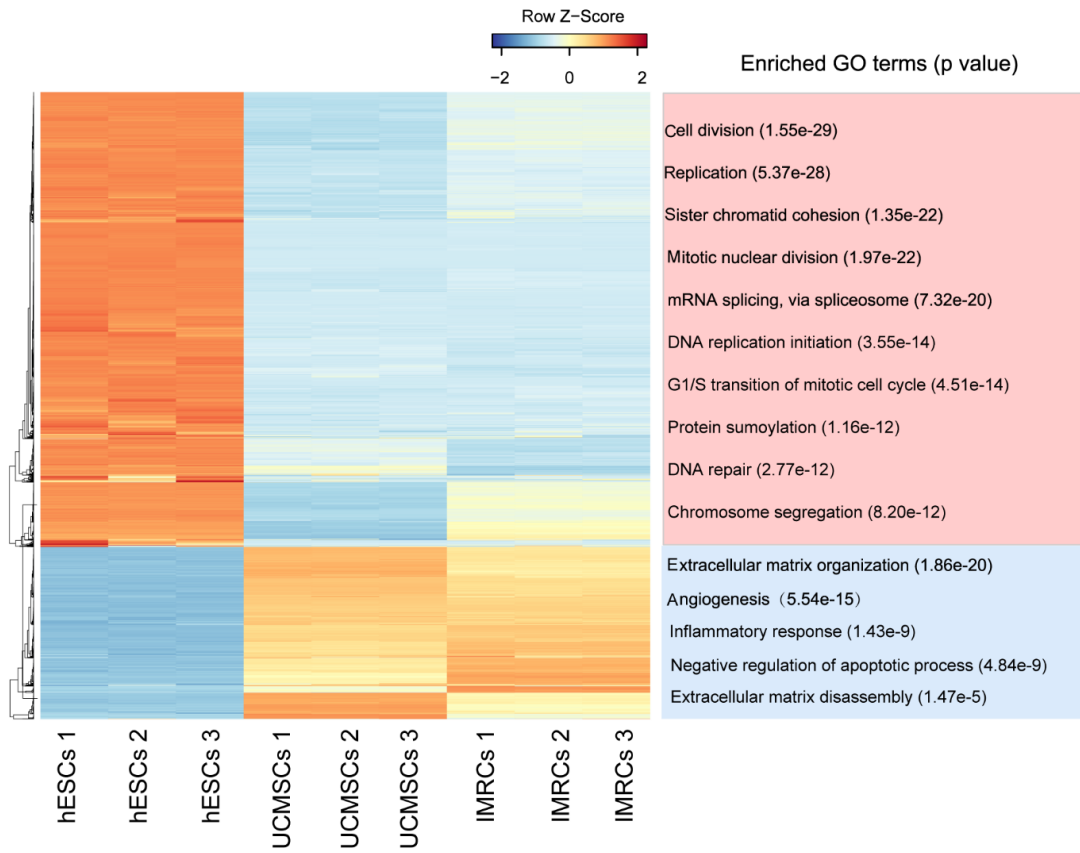

**Fig. S2 The differentially expressed genes among hESCs and UCMSCs, IMRCs.** In total, 4,730 differentially expressed genes were found in hESCs compared to UCMSCs and IMRCs. The enriched Gene Ontology (GO) terms and corresponding p values are shown.
