# Supplementary material for: Immunity-and-matrix-regulatory cells derived from human embryonic stem cells safely and effectively treat mouse lung injury and fibrosis
Source: PubMed Central journal article supplement (PMC7296193; doi:10.1038/s41422-020-0354-1), 2020-06-16
Supplement: 41422_2020_354_MOESM4_ESM.pdf [file 41422_2020_354_MOESM4_ESM.pdf]

Figure S4

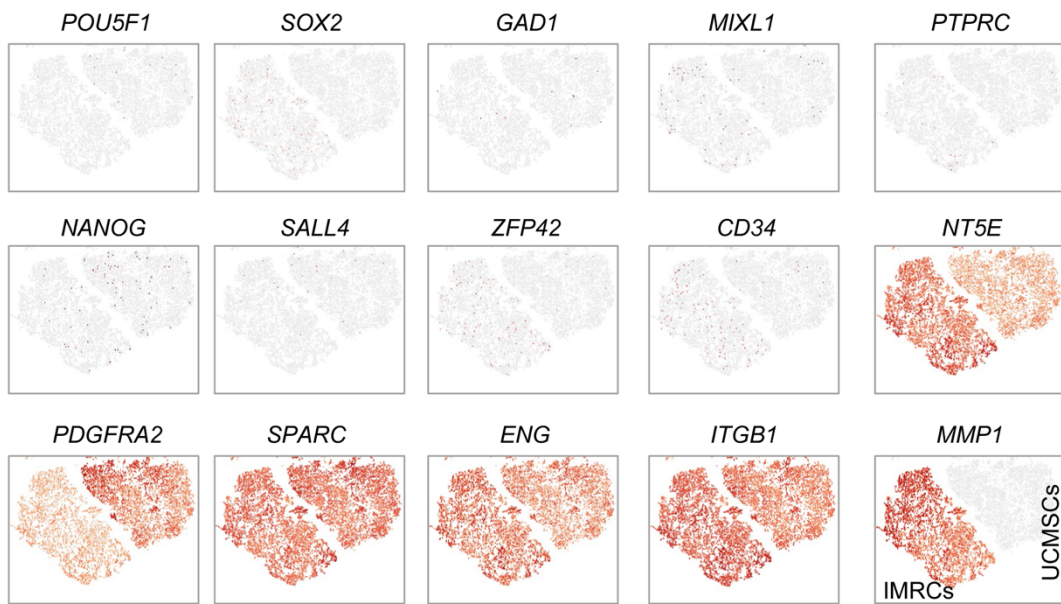

**Fig. S4 IMRCs possess unique gene expression characteristics.**

Heatmaps of specific gene expression amongst IMRCs and UCMSCs as measured by single cell RNAseq.
