# Supplementary material for: Immunity-and-matrix-regulatory cells derived from human embryonic stem cells safely and effectively treat mouse lung injury and fibrosis
Source: PubMed Central journal article supplement (PMC7296193; doi:10.1038/s41422-020-0354-1), 2020-06-16
Supplement: 41422_2020_354_MOESM5_ESM.pdf [file 41422_2020_354_MOESM5_ESM.pdf]

Figure S5

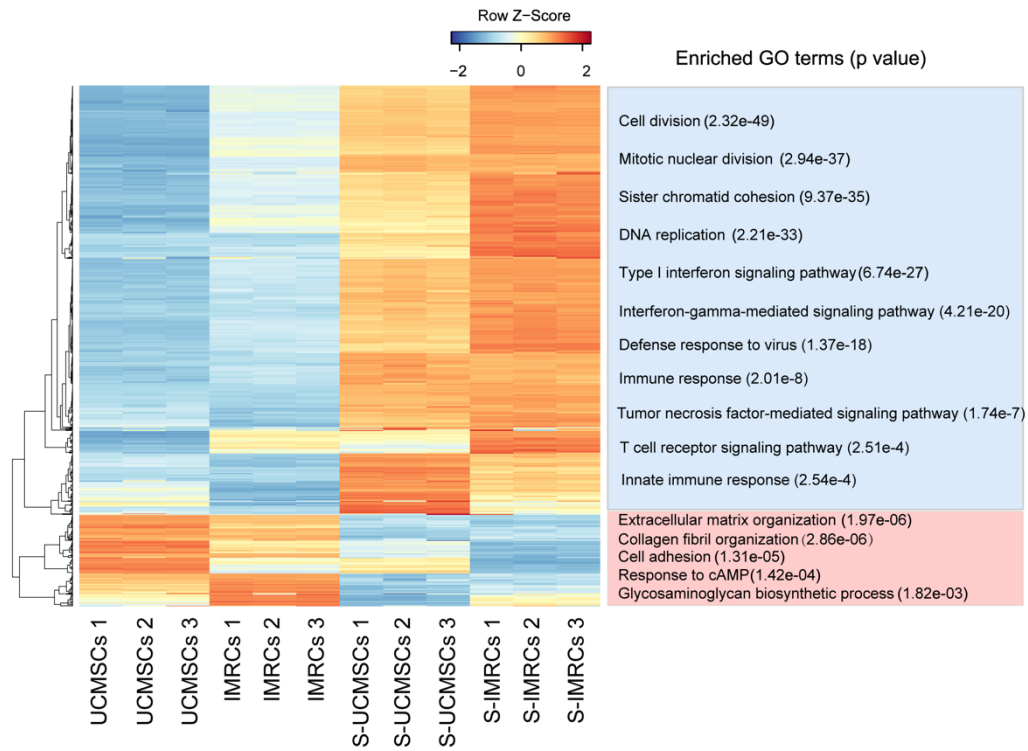

**Fig. S5** The differentially expressed genes in UCMSCs and IMRCs, before and after IFN- $\gamma$  stimulation. In total, 763 differentially expressed genes were found in UCMSCs and IMRCs before and after IFN- $\gamma$  stimulation. The enriched Gene Ontology (GO) terms and corresponding p values are shown.
