# Supplementary material for: Immunity-and-matrix-regulatory cells derived from human embryonic stem cells safely and effectively treat mouse lung injury and fibrosis
Source: PubMed Central journal article supplement (PMC7296193; doi:10.1038/s41422-020-0354-1), 2020-06-16
Supplement: 41422_2020_354_MOESM6_ESM.pdf [file 41422_2020_354_MOESM6_ESM.pdf]

Figure S6

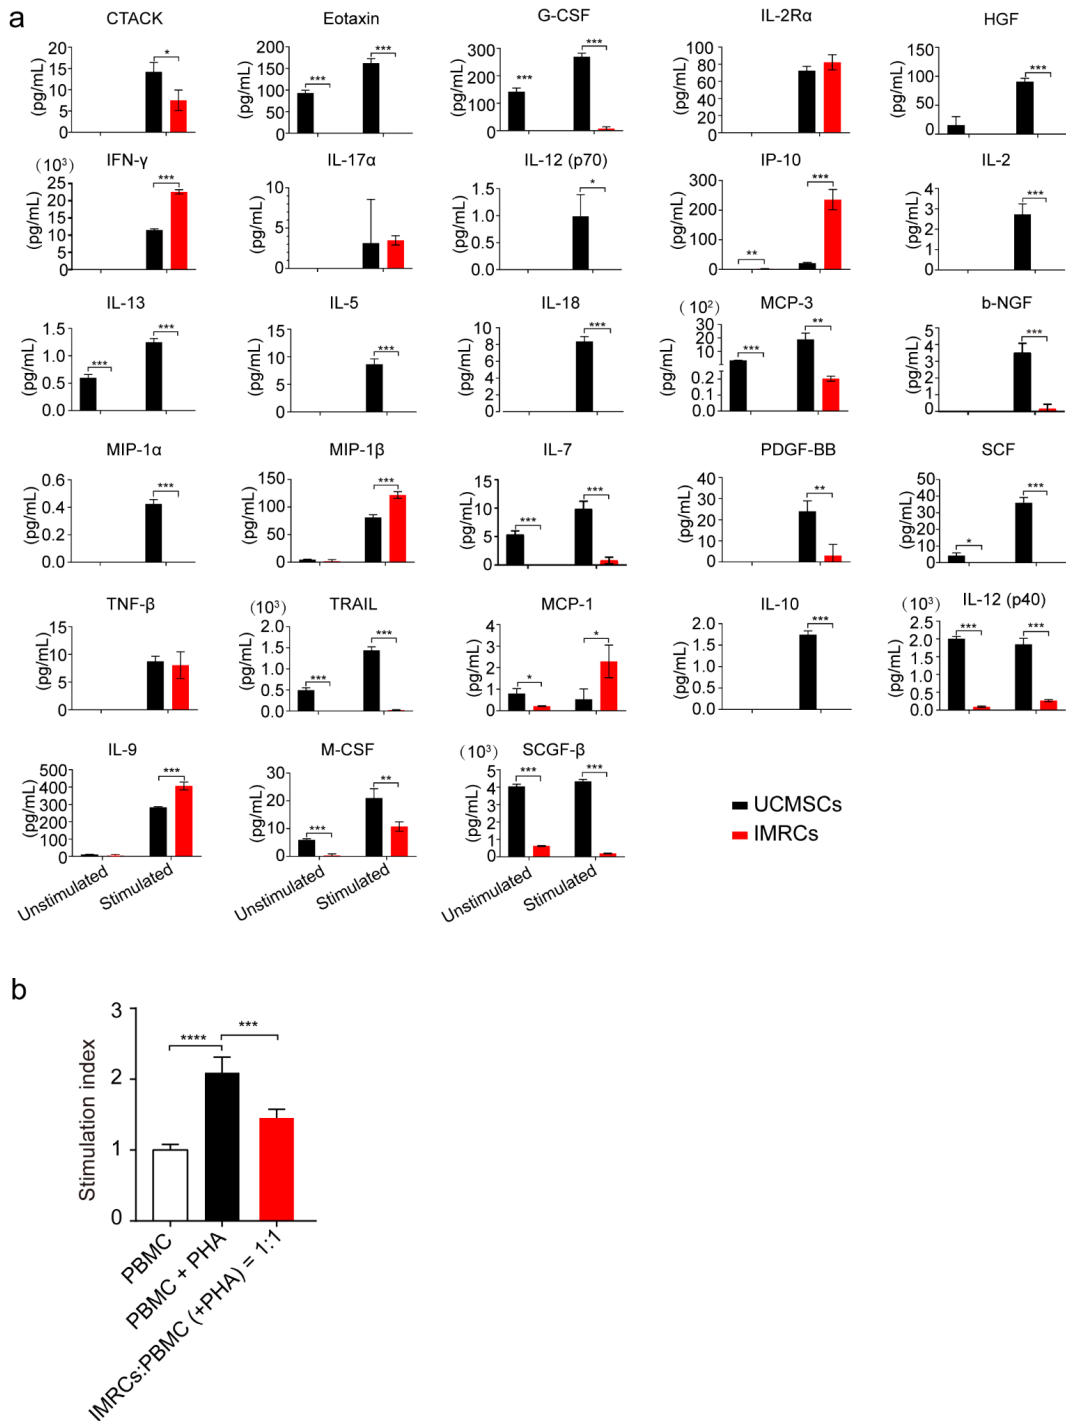

**Fig. S6 IMRCs activated by IFN- $\gamma$  show hyper-immunomodulatory potency.**

**a** ELISA analysis of biologically relevant chemokines and cytokines in the secretomes of unstimulated or stimulated IMRCs and UCMSCs. bFGF, IL-15 and IL-16 were not detected. **b** The immunosuppressive effect of IMRCs on phytohaemagglutinin (PHA)-stimulated PBMCs' proliferation when cocultured together at a ratio of 1:1 ( $2 \times 10^5$  IMRCs vs  $2 \times 10^5$  PBMCs). \*  $p <$

0.05, \*\*  $p < 0.01$ , \*\*\*  $p < 0.001$ , \*\*\*\*  $p < 0.0001$ ; data are represented as the mean  $\pm$  SEM.
