# Supplementary material for: Immunity-and-matrix-regulatory cells derived from human embryonic stem cells safely and effectively treat mouse lung injury and fibrosis
Source: PubMed Central journal article supplement (PMC7296193; doi:10.1038/s41422-020-0354-1), 2020-06-16
Supplement: 41422_2020_354_MOESM7_ESM.pdf [file 41422_2020_354_MOESM7_ESM.pdf]

Figure S7

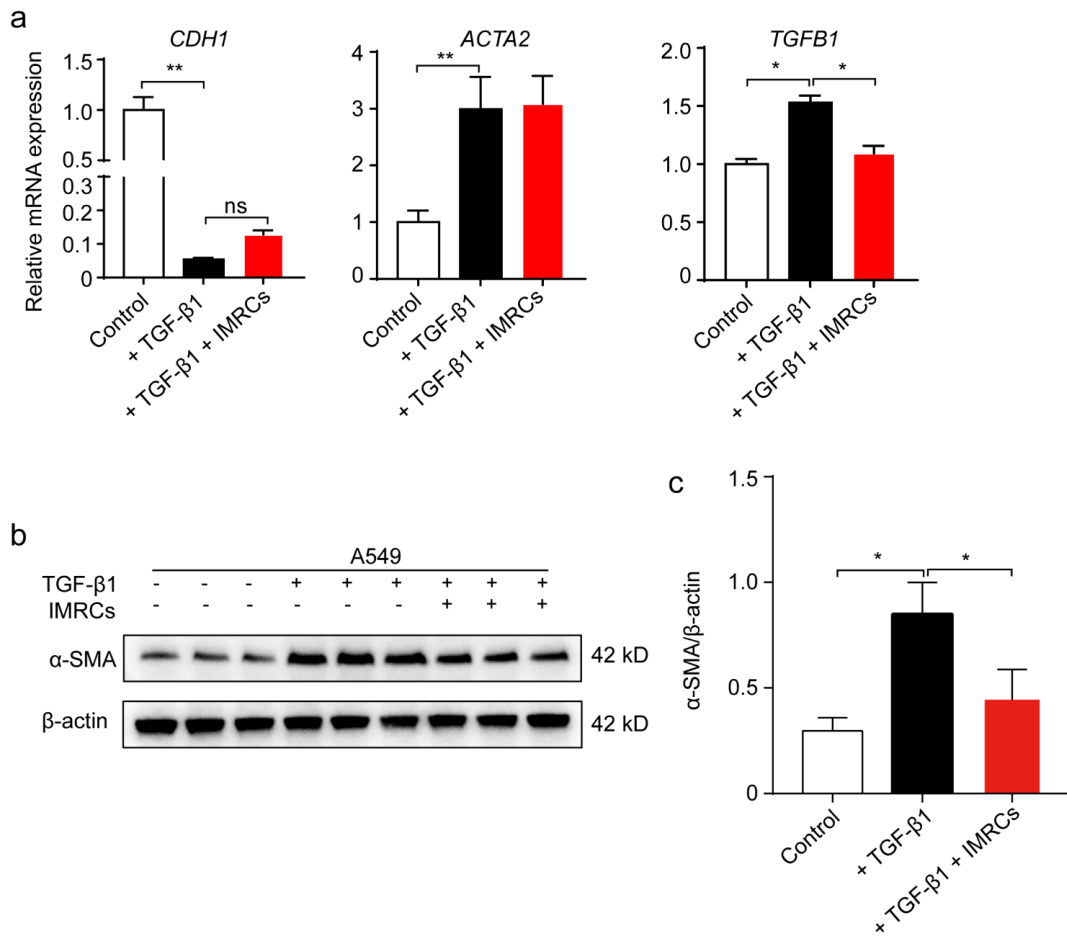

**Fig. S7 IMRCs reduce the pro-fibrotic effects of TGF-β1.**

**a** Quantitative PCR for *CDH1*, *ACTA2* and *TGFB1* mRNA in A549 cells, with or without 10 ng/mL TGF-β1 and IMRCs conditioned media treatment for 48 h. **b** Western blot for α-SMA protein expression in A549 cells, with or without 10 ng/mL TGF-β1 and IMRC conditioned media treatment for 48 h. **c** Quantification of the relative α-SMA protein expression levels in **(b)**. \*  $p < 0.05$ , \*\*  $p < 0.01$ ; data are represented as the mean  $\pm$  SEM.
