# Supplementary material for: Immunity-and-matrix-regulatory cells derived from human embryonic stem cells safely and effectively treat mouse lung injury and fibrosis
Source: PubMed Central journal article supplement (PMC7296193; doi:10.1038/s41422-020-0354-1), 2020-06-16
Supplement: 41422_2020_354_MOESM9_ESM.pdf [file 41422_2020_354_MOESM9_ESM.pdf]

## Figure S9

a

Acute toxicity test in cynomolgus monkeys: safety analysis (after 6 months)

| Group       | Number of monkey | Dose (cells/kg)     | Weight | Ophthalmology examination | Vital signs |
|-------------|------------------|---------------------|--------|---------------------------|-------------|
| High dose   | 1                | $1 \times 10^8$     | Normal | Normal                    | Normal      |
| Medium dose | 1                | $0.26 \times 10^8$  | Normal | Normal                    | Normal      |
| Low dose    | 1                | $0.026 \times 10^8$ | Normal | Normal                    | Normal      |

b

Long-term toxicity test in cynomolgus monkeys: safety analysis (one injection per week until 22 injections)

| Group     | Number of monkey       | Dose (cells/kg)    | Weight | Body temperature | Food intake | All organs' weight |
|-----------|------------------------|--------------------|--------|------------------|-------------|--------------------|
| Saline    | Female (3)<br>Male (3) | 10 mL / monkey     | Normal | Normal           | Normal      | Normal             |
| Low dose  | Female (3)<br>Male (3) | $0.26 \times 10^7$ | Normal | Normal           | Normal      | Normal             |
| High dose | Female (3)<br>Male (3) | $1 \times 10^8$    | Normal | Normal           | Normal      | Normal             |

### Fig. S9 Evaluation of the safety of IMRCs transfusion.

**a** Acute safety analysis of cynomolgus monkeys (*Macaca fascicularis*) injected with a low ( $0.026 \times 10^8$ ), medium ( $0.26 \times 10^8$ ) or high ( $1 \times 10^8$ ) dose of IMRCs after 6 months. **b** Long-term safety analysis of cynomolgus monkeys injected with a low ( $2.6 \times 10^6$ ) or high ( $1 \times 10^8$ ) dose of IMRCs, or saline, once a week for 22 times.
