# Supplementary material for: Immunity-and-matrix-regulatory cells derived from human embryonic stem cells safely and effectively treat mouse lung injury and fibrosis
Source: PubMed Central journal article supplement (PMC7296193; doi:10.1038/s41422-020-0354-1), 2020-06-16
Supplement: 41422_2020_354_MOESM11_ESM.pdf [file 41422_2020_354_MOESM11_ESM.pdf]

Figure S11

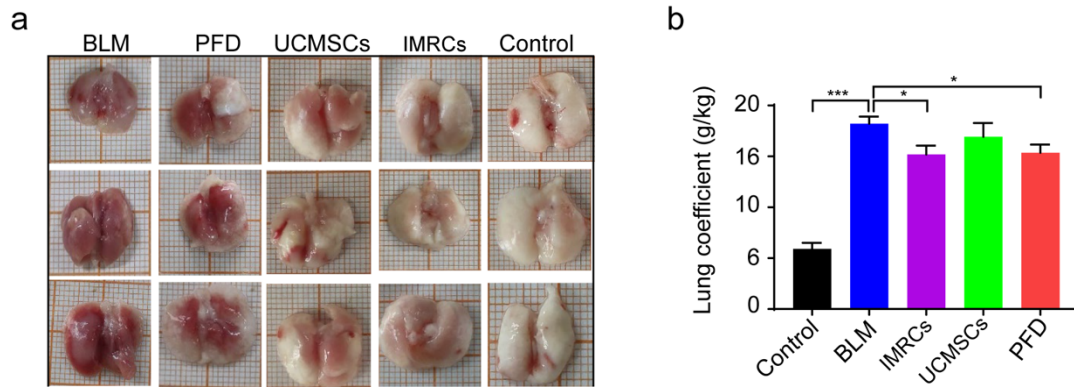

**Fig. S11 IMRC treatment of lung injury and fibrosis is superior to UCMSC and pirfenidone injections.**

**a** Representative images of whole lung from all treatment groups. One square, 1 mm. **b** Lung coefficient (wet lung weight/total body weight) of all treatment groups. \*  $p < 0.05$ , \*\*  $p < 0.01$ , \*\*\*  $p < 0.001$ ; data are represented as the mean  $\pm$  SEM.
