# Supplementary material for: Immunity-and-matrix-regulatory cells derived from human embryonic stem cells safely and effectively treat mouse lung injury and fibrosis
Source: PubMed Central journal article supplement (PMC7296193; doi:10.1038/s41422-020-0354-1), 2020-06-16
Supplement: 41422_2020_354_MOESM12_ESM.pdf [file 41422_2020_354_MOESM12_ESM.pdf]

Figure S12

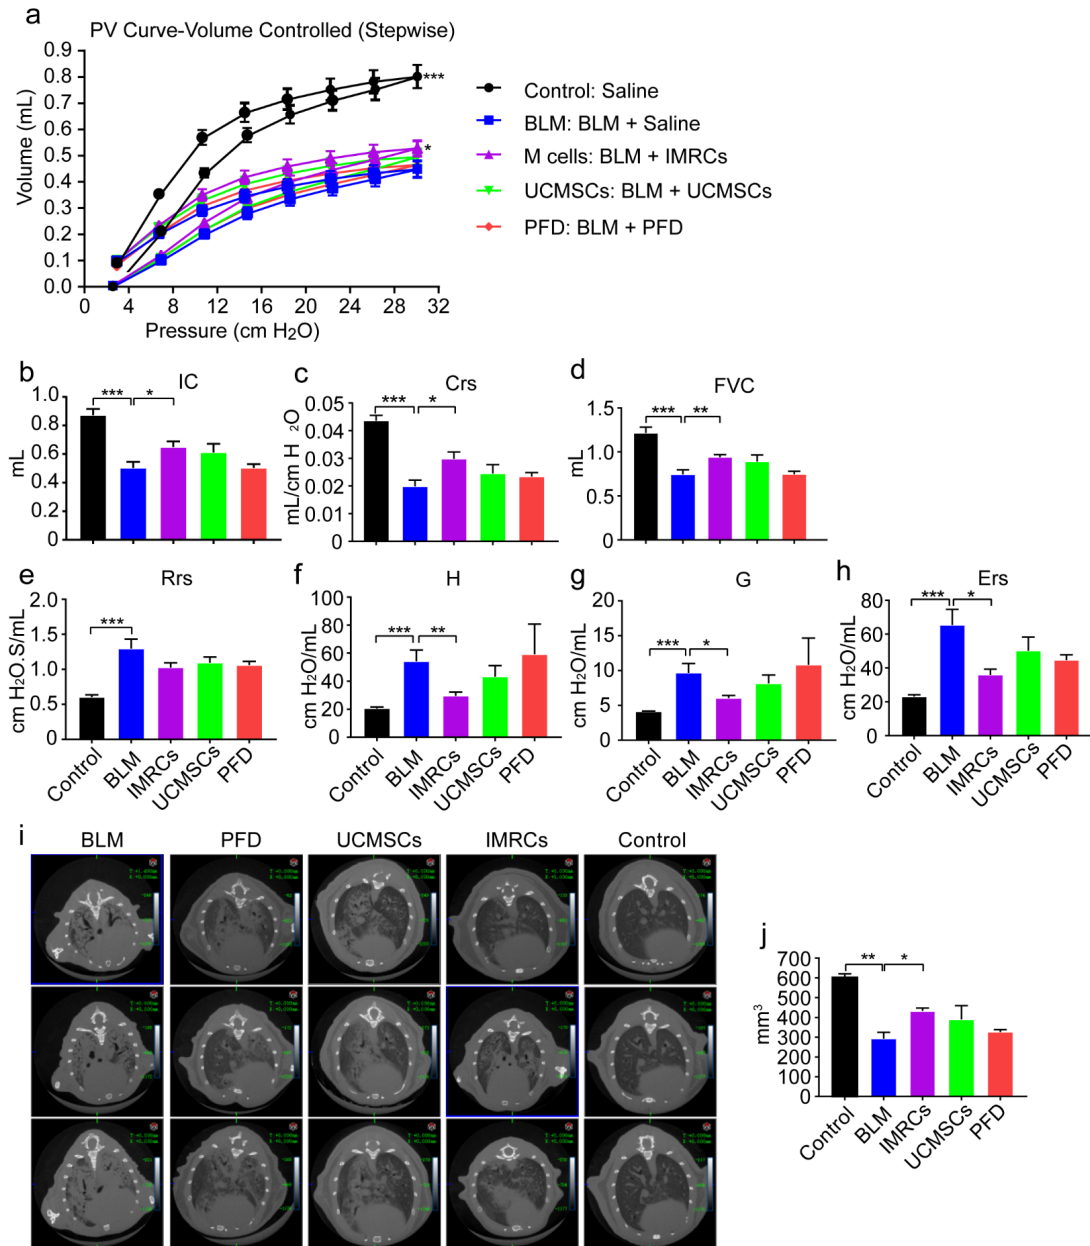

**Fig. S12 IMRC treatment of lung injury and fibrosis is superior to UCMSC and pirfenidone injections.**

**a-h** Lung mechanical function measured by FlexiVent at day 21, showing PV curves, IC, Rrs, Crs, Ers, G, H and FVC of all the experimental groups. PFD, pirfenidone; PV, pressure-volume; IC, inspiratory capacity; Rrs, respiratory resistance; Crs, static compliance; Ers, elastic resistance; G, tissue damping; H, tissue elasticity; FVC, forced vital capacity. **i-j** Micro-CT scans of the mouse lung and lung volume, in all the experimental groups. \*  $P < 0.05$ ; \*\*  $P < 0.01$ ; \*\*\*  $P < 0.001$ .
