# Supplementary material for: Immunity-and-matrix-regulatory cells derived from human embryonic stem cells safely and effectively treat mouse lung injury and fibrosis
Source: PubMed Central journal article supplement (PMC7296193; doi:10.1038/s41422-020-0354-1), 2020-06-16
Supplement: 41422_2020_354_MOESM13_ESM.pdf [file 41422_2020_354_MOESM13_ESM.pdf]

1 **Supplementary Table S1 Biological safety analysis of the human embryonic stem cells**  
 2 **(hESCs)-derived immunity- and matrix-regulatory cells (IMRCs)<sup>a</sup>.**

| <b>Sterility and pathogen<sup>b</sup></b>                              | <b>IMRCs</b>                                                                                            |
|------------------------------------------------------------------------|---------------------------------------------------------------------------------------------------------|
| <b>[Identification tests]</b>                                          |                                                                                                         |
| Cell morphology                                                        | Adherent cells in monolayer, showing fibroblast-like morphology                                         |
| Isozyme analysis                                                       | B type of human origin                                                                                  |
| Short tandem repeats (STRs)                                            | Expressing 16 STR loci, each STR locus has 1-2 alleles. STR data is consistent with its original hESCs. |
| <b>[Bacteria and fungi]</b>                                            | Negative                                                                                                |
| <b>[Mycoplasma]</b>                                                    | Negative                                                                                                |
| <b>[Exogenous virus test - in vitro]</b>                               |                                                                                                         |
| Cell observation                                                       | Cell morphology normal                                                                                  |
| Hemadsorption test                                                     | Negative                                                                                                |
| Hemagglutination test                                                  | Negative                                                                                                |
| <b>[Exogenous virus test - in vivo]</b>                                |                                                                                                         |
| Cell inoculation in suckling mice                                      | Survival rate > 80%                                                                                     |
| Cell inoculation in adult mice                                         | Survival rate > 80%                                                                                     |
| Cell inoculation in guinea pigs                                        | Survive, no tuberculosis                                                                                |
| Cell inoculation in rabbits                                            | Survive, no abnormality                                                                                 |
| Survival rate of 5- to 6-day-old chick embryos                         | Survival rate 100%                                                                                      |
| Survival rate of 9- to 11-day-old chick embryos                        | Survival rate 100%                                                                                      |
| Hemagglutination test of 9- to 11-day-old chick embryo allantoic fluid | Negative                                                                                                |
| <b>[Human virus test]</b>                                              |                                                                                                         |
| Human Immuno Deficiency Virus I (HIV-I)                                | Negative                                                                                                |
| Human Hepatitis B virus (HBV)                                          | Negative                                                                                                |
| Human Hepatitis C virus (HCV)                                          | Negative                                                                                                |

---

|                                                       |                                                                                      |
|-------------------------------------------------------|--------------------------------------------------------------------------------------|
| Human Cytomegalo Virus (HCMV)                         | Negative                                                                             |
| Epstein-Barr virus (EBV)                              | Negative                                                                             |
| Human Papillomavirus (HPV)                            | Negative                                                                             |
| Human herpes virus 6, 7 (HHV-6, 7)                    | Negative                                                                             |
| Human Parvovirus B19                                  | Negative                                                                             |
| <b>[Bovine virus test]</b>                            |                                                                                      |
| Bovine parvovirus                                     | Negative                                                                             |
| Bovine adenovirus                                     | Negative                                                                             |
| <b>[Porcine virus test]</b>                           |                                                                                      |
| Porcine parvovirus                                    | Negative                                                                             |
| Porcine torque teno virus                             | Negative                                                                             |
| <b>[Retrovirus test]</b>                              |                                                                                      |
| Reverse transcriptase activity                        | Negative                                                                             |
| <b>[Immunological response test]</b>                  |                                                                                      |
| Lymphocyte proliferation inhibition rate              | 92.8%, coculture of IMRCs and peripheral blood monocytes (PBMCs) in the ratio of 1:5 |
| Specific subsets of lymphocytes test                  |                                                                                      |
| Th1 lymphocyte proliferation inhibition rate          | 45.2%, coculture of IMRCs and PBMCs in the ratio of 1:5                              |
| Th17 lymphocyte proliferation inhibition rate         | 48.0%, coculture of IMRCs and PBMCs in the ratio of 1:5                              |
| Treg lymphocyte proliferation inhibition rate         | 13.8%, coculture of IMRCs and PBMCs in the ratio of 1:5                              |
| TNF- $\alpha$ secretion of lymphocyte inhibition rate | 91.8%, coculture of IMRCs and PBMCs in the ratio of 1:5                              |
| <b>[Biological effectiveness test]</b>                |                                                                                      |
| CD73 (%)                                              | 98.9                                                                                 |
| CD90 (%)                                              | 98.8                                                                                 |
| CD105 (%)                                             | 95.8                                                                                 |

---

|                                                |                                                                                                                         |
|------------------------------------------------|-------------------------------------------------------------------------------------------------------------------------|
| CD29 (%)                                       | 99.7                                                                                                                    |
| HLA-ABC (%)                                    | 99.5                                                                                                                    |
| CD11 (%)                                       | < 0.1                                                                                                                   |
| CD19 (%)                                       | < 0.1                                                                                                                   |
| CD34 (%)                                       | < 0.1                                                                                                                   |
| CD45 (%)                                       | < 0.1                                                                                                                   |
| HLA-DR (%)                                     | < 0.1                                                                                                                   |
| <b>[Pluripotent cells residuals]</b>           |                                                                                                                         |
| TRA-1-60 <sup>+</sup> proportion assay by FACS | < 0.1%                                                                                                                  |
| SSEA-4 <sup>+</sup> proportion assay by FACS   | 0.3%                                                                                                                    |
| TRA-1-81 <sup>+</sup> proportion assay by FACS | < 0.1%                                                                                                                  |
| OCT4 expression assay by immunofluorescence    | Negative, while its original hESCs is positive                                                                          |
| NANOG expression assay by immunofluorescence   | Negative, while its original hESCs is positive                                                                          |
| OCT4 expression assay by PCR                   | Negative, while its original hESCs is positive                                                                          |
| Nanog expression assay by PCR                  | Negative, while its original hESCs is positive                                                                          |
| Teratoma formation in SCID mice                | Six weeks after cell inoculation in SCID mice, no teratoma formation was observed, while its original hESCs is positive |
| <b>[Bioprepate test]</b>                       |                                                                                                                         |
| Endotoxin assay                                | ≤ 0.5 EU/mL                                                                                                             |
| Bovine serum albumin residuals                 | < 50 ng/mL                                                                                                              |

3 <sup>a</sup>This table is translated from NIFDC report (NO. SH201905849).

4 <sup>b</sup>The “Pharmacopoeia of the People’s Republic of China, Edition 2015, Volume III” was used as a  
5 reference for the testing methods.
