# Supplementary material for: Immunity-and-matrix-regulatory cells derived from human embryonic stem cells safely and effectively treat mouse lung injury and fibrosis
Source: PubMed Central journal article supplement (PMC7296193; doi:10.1038/s41422-020-0354-1), 2020-06-16
Supplement: 41422_2020_354_MOESM14_ESM.pdf [file 41422_2020_354_MOESM14_ESM.pdf]

1 **Supplementary Table S2** Primer sequences used in this study.

| Gene name                     | Forward (5'-3')        | Reverse (5'-3')          |
|-------------------------------|------------------------|--------------------------|
| <i>MMP1</i>                   | TGCTTCCTGAGACCCAGTT    | GATCACTTCTTTCTTTGCATCAAG |
| <i>IDO1</i>                   | GCCAGCTTCGAGAAAGAGTTG  | ATCCCAGAACTAGACGTGCAA    |
| <i>CDH1</i>                   | AAAGGCCCATTTCTAAAAACCT | TGCGTTCTCTATCCAGAGGCT    |
| <i>ACTA2</i>                  | AAAAGACAGCTACGTGGGTGA  | GCCATGTTCTATCGGGTACTTC   |
| <i>COLLAGEN I</i>             | GAGGGCCAAGACGAAGACATC  | CAGATCACGTCATCGCACAAAC   |
| <i>COLLAGEN II</i>            | TGGACGCCATGAAGGTTTTCT  | TGGGAGCCAGATTGTCATCTC    |
| <i>TGF<math>\beta</math>1</i> | CTAATGGTGGAAACCCACAACG | TATCGCCAGGAATTGTTGCTG    |
| <i>FIBRONECTIN</i>            | AGGAAGCCGAGGTTTTAACTG  | AGGACGCTCATAAGTGTCAAC    |
| <i>GAPDH</i>                  | CTCTGCTCCTCCTGTTTCGAC  | CGACCAAATCCGTTGACTCC     |

2

3
