# Supplementary material for: Immunity-and-matrix-regulatory cells derived from human embryonic stem cells safely and effectively treat mouse lung injury and fibrosis
Source: Cell Res. 2020 Jun 16;30(9):794–809. doi: 10.1038/s41422-020-0354-1 (PMC7296193; doi:10.1038/s41422-020-0354-1)
Supplement: Supplementary file 10 — Supplementary Figure S10 [file 41422_2020_354_MOESM10_ESM.pdf]

Figure S10

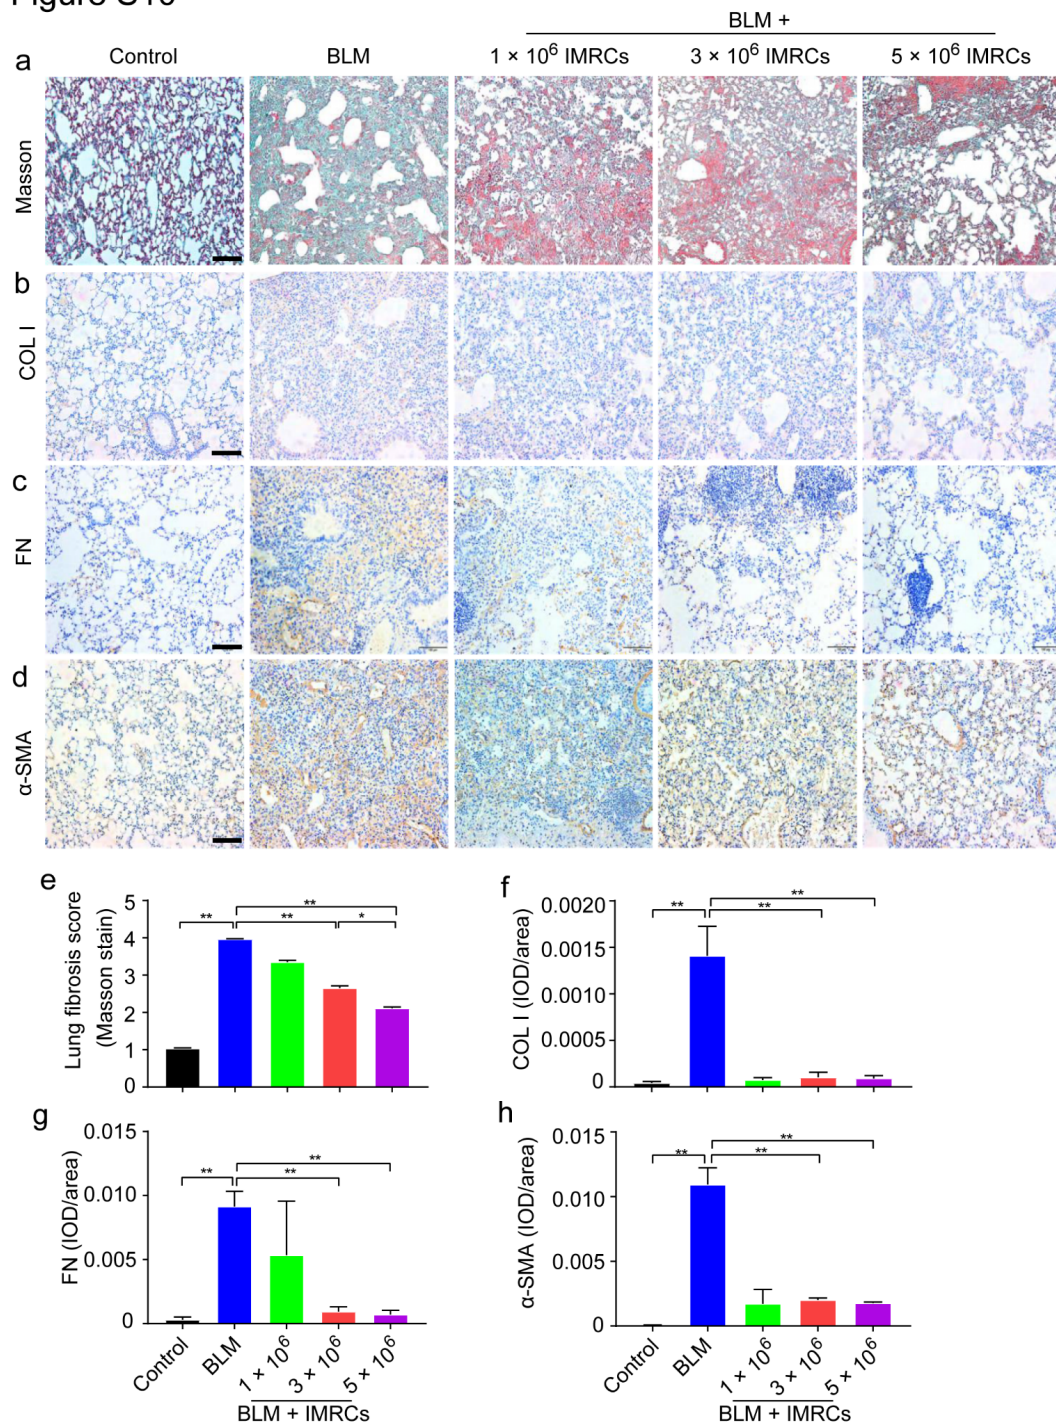

**Fig. S10 IMRC transfusion treats lung injury and fibrosis dose-dependently.**

**a** Representative lung sections of all treatment groups after Masson's trichrome staining ( $\times 200$ ). BLM, bleomycin. **b-d** Immunohistochemistry staining (brown) for the protein expression of **(b)** Collagen I (COL I), **(c)** Fibronectin (FN) and **(d)**  $\alpha$ -smooth muscle actin ( $\alpha$ -SMA), in mice receiving different interventions. **e** Lung fibrosis score, based on Masson's trichrome staining of lung sections in mice receiving different interventions. **f-h** Quantification of the immunohistochemistry staining

for **(f)** Collagen I, **(g)** Fibronectin, and **(h)**  $\alpha$ -SMA. \*  $p < 0.05$ , \*\*  $p < 0.01$ ; data are represented as the mean  $\pm$  SEM.
